# Supplementary material for: Nanotechnology meets immunology towards a rapid diagnosis solution: the COVID-19 outbreak challenge
Source: Royal Society of Chemistry journal article supplement (doi:10.1039/d2ra05096j), 2022-01-01
Supplement: d2ra05096j1.pdf [file d2ra05096j1.pdf]

*Electronic Supplementary Information*

## Nanotechnology Meets Immunology Towards a Rapid Diagnosis

### Solution: The COVID-19 Outbreak Challenge

Santos BSAS<sup>1</sup>, Cunha JLR<sup>1,7</sup>, Carvalho IC<sup>2</sup>, Costa JMC<sup>1</sup>, Longo BC<sup>1</sup>, Galinari GCF<sup>1</sup>,  
Diniz PHSM<sup>1,3</sup>, Mendes GMM<sup>1,4</sup>, Fonseca FG<sup>6</sup>, Abrahão JS<sup>6</sup>, Mansur AAP<sup>2</sup>, Leite MF<sup>5</sup>,  
Oréfica RL<sup>2</sup>, Lobato ZIP<sup>1</sup>, Mansur HS<sup>2,\*</sup>

1. Universidade Federal de Minas Gerais (UFMG), Departamento de Medicina Veterinária Preventiva, Belo Horizonte, MG, Brasil; 2. Universidade Federal de Minas Gerais (UFMG), Departamento de Engenharia Metalúrgica e de Materiais, MG, Brasil; 3. Universidade Federal de Minas Gerais (UFMG), Colégio Técnico, Belo Horizonte, MG, Brasil; 4. Universidade Federal de Minas Gerais (UFMG), Faculdade de Farmácia, Belo Horizonte, MG, Brasil; 5. Universidade Federal de Minas Gerais (UFMG), Departamento de Fisiologia e Biofísica, Belo Horizonte, MG, Brasil; 6. Universidade Federal de Minas Gerais (UFMG), Instituto de Ciências Biológicas, Belo Horizonte, MG, Brasil; 7. University of York, York Biomedical Institute, York, United Kingdom.

#### Evaluation of AuNP, antibodies concentration, and AuNP:HAb ratio.

The overall features of both bare and conjugate nanoparticles depend on the concentration of the metallic *nuclei* and the amount of HAb located on their surface. The estimation of both [BIOCOR\_VID19\_30] and BIOCOR\_VID19\_30:HAb (AuNP:HAb ratio) ratio was performed using the initial concentration of the precursors, the atomic mass and density of Au ( $MM_{Au} = 197$  g/mol;  $\rho_{Au} = 19.3$  g/cm<sup>3</sup>), and the results of the mean diameter of the AuNP obtained along the synthesis steps. So, DLS measurements were performed following several synthesis stages, and the results are summarized in Table S1.

**Table S1** Summary of results based on DLS data for initial, partials, and final steps of the synthesis of BIOCOR\_VID19\_30.

| Synthesis step | Au <sup>3+</sup> accumulated volume (mL) | Au <sup>3+</sup> accumulated quantity (mmol) | Mean H <sub>D</sub> (nm) | Polydispersity Index (PDI) | Volume of each AuNP (nm <sup>3</sup> ) |
|----------------|------------------------------------------|----------------------------------------------|--------------------------|----------------------------|----------------------------------------|
| 1              | 1.0                                      | 0.01                                         | 12                       | 0.12                       | 905                                    |
| 2              | 2.0                                      | 0.02                                         | 18                       | 0.13                       | 3054                                   |
| 5              | 5.0                                      | 0.05                                         | 26                       | 0.08                       | 9203                                   |
| 7              | 7.0                                      | 0.07                                         | 30                       | 0.07                       | 14138                                  |

\* To whom correspondence should be addressed: Federal University of Minas Gerais, Av. Antônio Carlos, 6627 – Escola de Engenharia, Bloco 2 – Sala 2233, 31.270-901, Belo Horizonte/MG, Brazil; Tel/Fax: +55-31-34091843; E-mail: [hmansur@demet.ufmg.br](mailto:hmansur@demet.ufmg.br) (H. Mansur)

For the calculations, the following assumptions were applied:

- i. The nanoparticles can be considered perfect spheres.
- ii. The total number of nanoparticles must be formed during the first step of the synthesis - nuclei formation, and the following steps must collaborate only for nanoparticle growth.
- iii. Considering the initial amount of  $\text{Au}^{3+}$  (0.010 mmol) and the obtained diameter of *nuclei* generated in the first step of the synthesis ( $2R=12$  nm), the theoretical value of  $[\text{AuNP}]$ , considering 100% of reaction yield, is  $[\text{AuNP}] = 0.70 \mu\text{M}$ .

During conjugation, it was used 0.875 mL of AuNP suspension in a final volume of 1 mL leading to a concentration of  $[\text{AuNP}] = 0.61 \mu\text{M}$  and the concentration of  $[\text{HAb}]$  in the final volume was set to 100  $\mu\text{g/mL}$  (0.66  $\mu\text{M}$ ). Then, the molar ratio AuNP:HAb  $\sim 1:1.1$ .

After conjugation, for LFA assays, the volume of suspension with the conjugate AuNP:antibody was reduced by half, increasing by 2 times the final concentration at conjugation step.

**Table S2** Bioconjugated Nanomaterials for the Diagnosis of the SARS-CoV-2 Antigen or Virus (PRAMANIK et al., 2022, copyright – ACS on 28-sept-2022. DOI: 10.1021/accountsr.1c00177)

| target molecules              | detection platform              | bioconjugated nanostructure used                | detection time | detection sensitivity      | ref |
|-------------------------------|---------------------------------|-------------------------------------------------|----------------|----------------------------|-----|
| SARS-CoV-2 N gene             | colorimetric                    | RNA/DNA-attached gold nanoparticle              | 10 min         | 0.18 ng/ $\mu\text{L}$     | 16  |
| SARS-CoV-2 spike protein      | colorimetric                    | antibody-conjugated gold nanoparticles          | 5 min          | 1 ng/mL                    | 23  |
| SARS-CoV-2 spike protein      | colorimetric                    | MNAzyme-conjugated gold nanoparticles           | 5 min          | 90% for clinical samples   | 39  |
| SARS-CoV-2 S, N & P gene      | colorimetric                    | antibody-conjugated gold nanoparticles          | 20 min         | 95% for clinical samples   | 21  |
| SARS-CoV-2 IgM/IgG antibodies | colorimetric-based lateral flow | nucleoprotein-attached gold nanoparticles       | 15 min         | 93% for clinical samples   | 27  |
| SARS-CoV-2 RNA                | colorimetric CRISPR/Cas         | RNA/DNA-attached gold nanoparticle              | 15 min         | 95.2% for clinical samples | 22  |
| SARS-CoV-2 spike protein      | SERS                            | antibody-conjugated gold nanoparticles          | 10 min         | 4 pg/mL                    | 23  |
| SARS-CoV-2 spike protein      | SERS                            | antibody-attached graphene                      | 15 min         | 3.75 fg/mL                 | 38  |
| SARS-CoV-2 IgM/IgG antibodies | SERS-based LFA                  | antigen-attached $\text{SiO}_2@Ag$ nanoparticle | 20 min         | 100% for clinical samples  | 35  |
| SARS-CoV-2 spike protein      | SERS                            | antibody-conjugated gold nanoparticles          | 20 min         | 87.7% clinical sample      | 42  |
| SARS-CoV-2 spike protein      | NSET                            | aptamer-conjugated gold nanoparticles           | 10 min         | 130 fg/mL                  | 24  |
| SARS-CoV-2 spike protein      | fluorescence                    | ACE2-attached SWCNT                             | 90 min         | 12.6 nM                    | 37  |
| SARS-CoV-2 IgG and IgM        | fluorescence-based LFA          | antigen/ $\text{SiO}_2@Au@QD$ nanobeads         | 15 min         | 100% for clinical samples  | 28  |
| SARS-CoV-2 spike protein      | NSET                            | antibody-coated quantum dots                    | 20 min         | 200 fg/mL                  | 30  |
| SARS-CoV-2 spike protein      | field effect transistor         | antibody-coated MXene-graphene                  | 50 s           | 1 fg/mL                    | 36  |
| SARS-CoV-2 RNA                | RT-PCR                          |                                                 | 6 h            | 97% for clinical samples   | 8   |
| SARS-CoV-2 RNA                | CRISPR-Cas                      |                                                 | 40 min         | 95% for clinical samples   | 11  |
| SARS-CoV-2 antigen            | LFA                             |                                                 | 15 min         | 95% for clinical samples   | 8   |

**Figures**

| A) |   | not infected |    |    |    | infected |    |    |    | P2 reactivity test and J4 and J5 peptides |    |    |    |
|----|---|--------------|----|----|----|----------|----|----|----|-------------------------------------------|----|----|----|
|    |   | 1            | 2  | 3  | 4  | 5        | 6  | 7  | 8  | 9                                         | 10 | 11 | 12 |
| J4 | A | C1           | C1 | C2 | C2 | C1       | C1 | C2 | C2 | +                                         | +  | -  | -  |
| J5 | B | C1           | C1 | C2 | C2 | C1       | C1 | C2 | C2 | +                                         | +  | -  | -  |
| P2 | C | C1           | C1 | C2 | C2 | C1       | C1 | C2 | C2 |                                           |    |    |    |
| J4 | D | +            | +  | -  | -  | +        | +  | -  | -  | +                                         | +  | -  | -  |
| J5 | E | +            | +  | -  | -  | +        | +  | -  | -  | +                                         | +  | -  | -  |
| P2 | F | +            | +  | -  | -  | +        | +  | -  | -  | +                                         | +  | -  | -  |
|    | G |              |    |    |    |          |    |    |    |                                           |    |    |    |
|    | H |              |    |    |    |          |    |    |    |                                           |    |    |    |

Controls (lines D-E-F):  
 Column 1 a 4: PBS+serum+conjugate  
 Column 5 a 8: PBS+serum  
 Column 9 a 12: peptide+serum

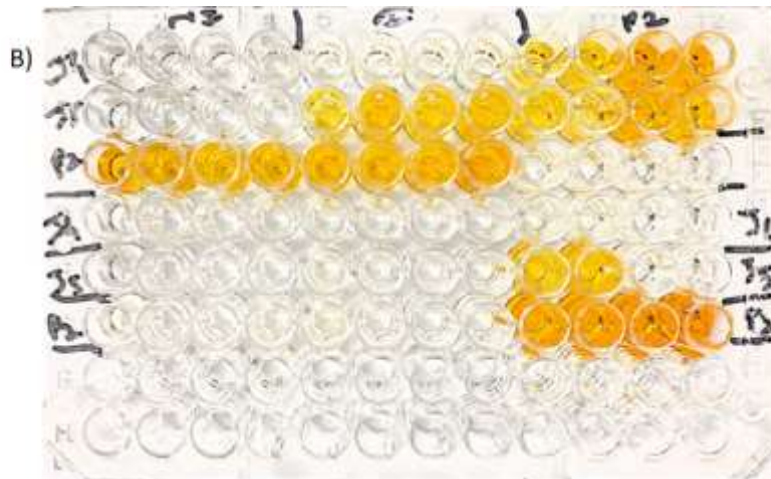

| C) | 1     | 2     | 3     | 4     | 5     | 6     | 7     | 8     | 9     | 10    | 11    | 12    |     |
|----|-------|-------|-------|-------|-------|-------|-------|-------|-------|-------|-------|-------|-----|
| A  | 0.05  | 0.048 | 0.049 | 0.05  | 0.058 | 0.058 | 0.058 | 0.061 | 0.145 | 0.204 | 0.697 | 0.604 | 490 |
| B  | 0.046 | 0.046 | 0.048 | 0.047 | 0.166 | 0.465 | 0.239 | 0.435 | 0.211 | 0.13  | 0.625 | 0.382 | 490 |
| C  | 0.612 | 0.641 | 0.464 | 0.588 | 0.659 | 0.62  | 0.633 | 0.857 | 0.052 | 0.054 | 0.053 | 0.051 | 490 |
| D  | 0.048 | 0.049 | 0.047 | 0.047 | 0.05  | 0.049 | 0.045 | 0.046 | 0.056 | 0.062 | 0.054 | 0.055 | 490 |
| E  | 0.05  | 0.047 | 0.047 | 0.047 | 0.06  | 0.055 | 0.045 | 0.048 | 0.214 | 0.363 | 0.046 | 0.049 | 490 |
| F  | 0.063 | 0.057 | 0.049 | 0.064 | 0.072 | 0.054 | 0.053 | 0.056 | 1.147 | 1.045 | 0.829 | 0.917 | 490 |
| G  | 0.037 | 0.037 | 0.036 | 0.038 | 0.039 | 0.036 | 0.037 | 0.037 | 0.038 | 0.041 | 0.036 | 0.037 | 490 |
| H  | 0.037 | 0.039 | 0.037 | 0.037 | 0.037 | 0.036 | 0.037 | 0.037 | 0.04  | 0.059 | 0.049 | 0.041 | 490 |

**Figure S1** A) cross-reaction ELISA plate map. B) finished ELISA plate. C) Absorbance readings measured in the spectrophotometer after completion of the ELISA.

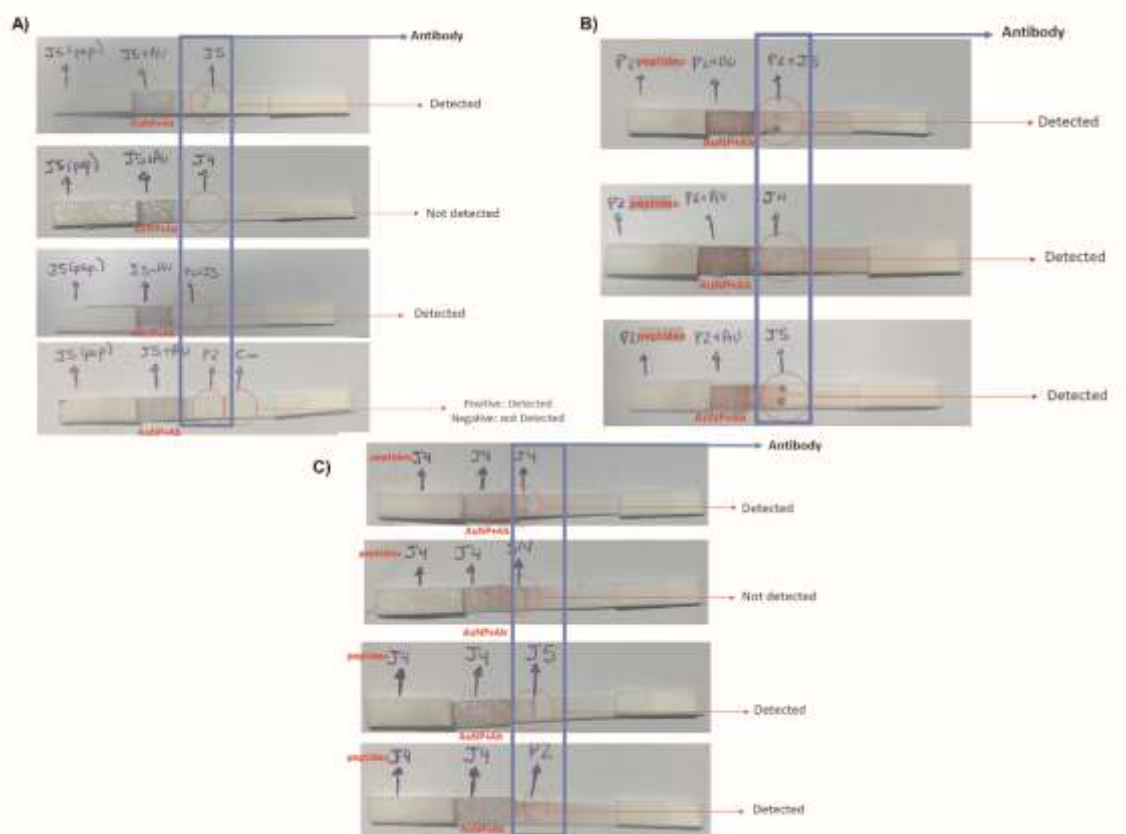

**Figure S2** A) LFA sample: peptide J5; AuNP: peptide J5; membrane: anti-peptide J5 – anti-peptide J4 – anti-peptide P2+J5 and anti-peptide P2+negative sera respectively; B) LFA sample: peptide P2; AuNP: peptide P2; membrane: anti-peptide P2+J5 – anti-peptide J4 and anti-peptide J5 respectively; C) LFA sample: peptide J4; AuNP: peptide J4; membrane: anti-peptide J4 – Negative sera – anti-peptide J5 and anti-peptide P2 respectively.

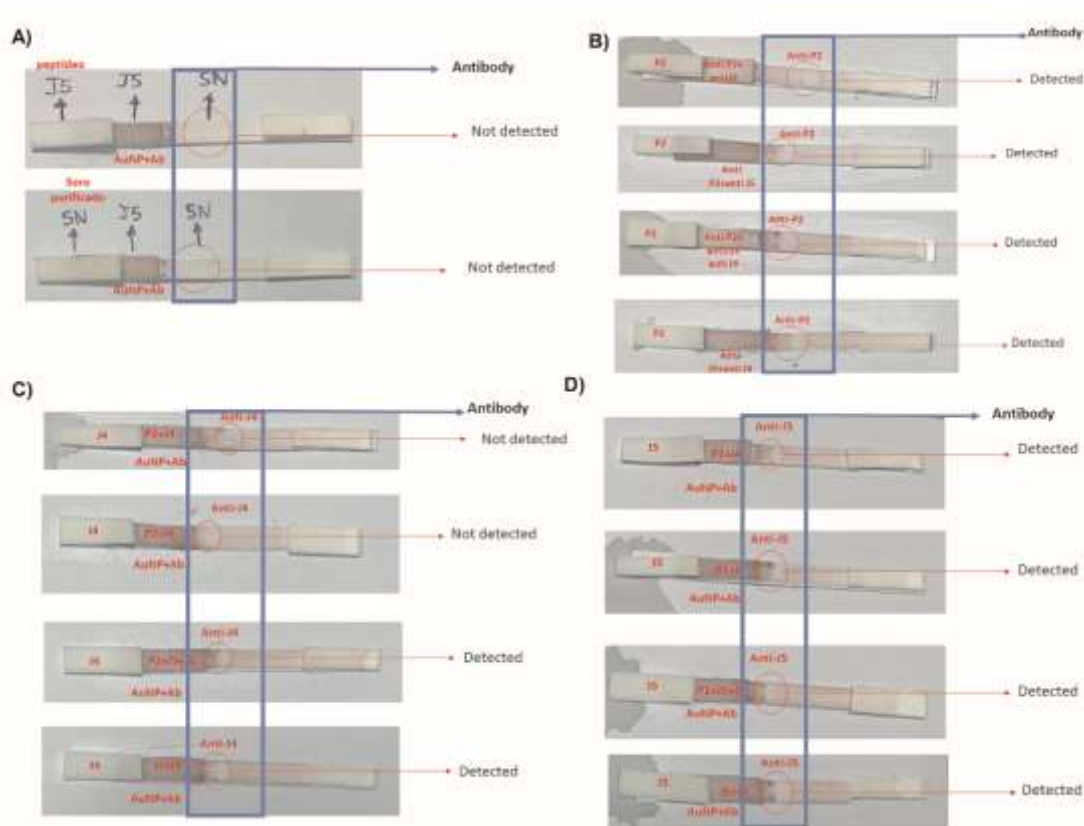

**Figure S3** A) LFA sample: peptide J5 and negative sera respectively; AuNP: and anti-peptide J5; membrane: negative sample; B) LFA sample: peptide P2; AuNP: anti-peptide P2+anti-peptide J4 - anti-peptide P2+anti-peptide J5 - anti-peptide P2+anti-peptide J4+ anti-peptide J5 and anti-peptide J5+anti-peptide J4 respectively; membrane: anti-peptide P2; C) LFA sample: peptide J4; AuNP: anti-peptide P2+anti-peptide J4 - anti-peptide P2+anti-peptide J5 - anti-peptide P2+anti-peptide J4+ anti-peptide J5 and anti-peptide J5+anti-peptide J4 respectively; membrane: anti-peptide J4; D) LFA sample: peptide J5; AuNP: anti-peptide P2+anti-peptide J4 - anti-peptide P2+anti-peptide J5 - anti-peptide P2+anti-peptide J4+ anti-peptide J5 and anti-peptide J5+anti-peptide J4 respectively; membrane: anti-peptide J5.

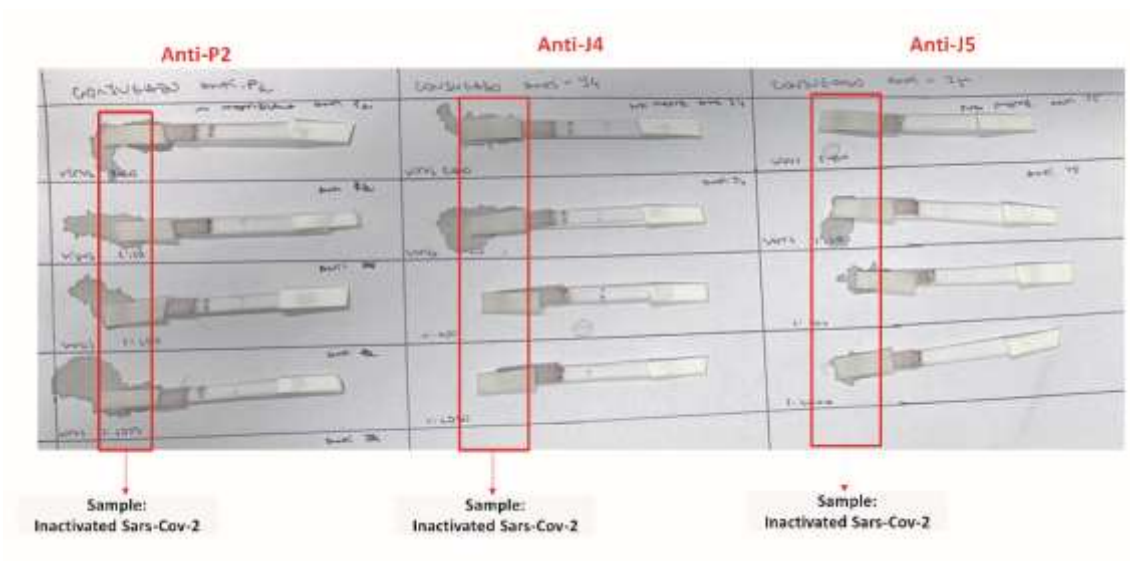

**Figure S4 Anti-P2:** LFA sample: SARS-CoV-2 inactivated pure and in the dilutions 1:10, 1:100, and 1:1000 respectively; AuNP: anti-peptide P2; membrane: anti-peptide P2. **Anti-J4:** LFA sample: SARS-CoV-2 inactivated pure and in the dilutions 1:10, 1:100, and 1:1000, respectively; AuNP: anti-peptide P2; membrane: anti-peptide J4. **Anti-J5:** LFA sample: SARS-CoV-2 inactivated pure and in the dilutions 1:10, 1:100, and 1:1000, respectively; AuNP: anti-peptide P2; membrane: anti-peptide J5.
